# Supplementary material for: Dexamethasone Downregulates Autophagy through Accelerated Turn-Over of the Ulk-1 Complex in a Trabecular Meshwork Cells Strain: Insights on Steroid-Induced Glaucoma Pathogenesis
Source: MDPI journal article supplement (doi:10.3390/ijms22115891), 2021-05-31
Supplement: s1 [file s1]

## SUPPLEMENTARY FIGURES

A

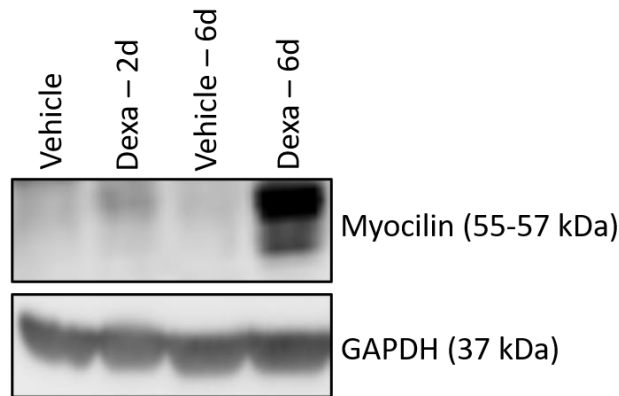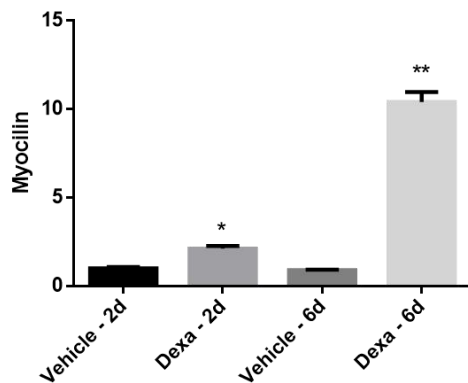

B

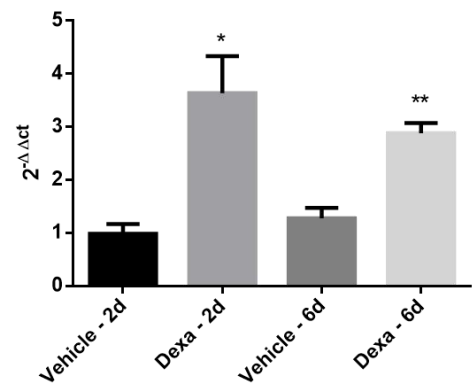

**Figure 1: Validation of TMC strain identity.** (A) Myocilin staining of Dexa-2d and Dexa-6d cells (and correspondent Vehicle cells) by denaturing and reducing Wb. GAPDH was used as internal control. A representative image of three independent experiments is here shown (n=3). One-way ANOVA followed by Tukey's post-hoc significance test. \*p<0.001; \*\*p<0.00001; (B) RT-PCR analysis of myocilin gene expression. GAPDH was used as internal control. Values were determined through the  $2^{-\Delta\Delta C_t}$  formula. \*p<0.0001, \*\*p<0.0015.

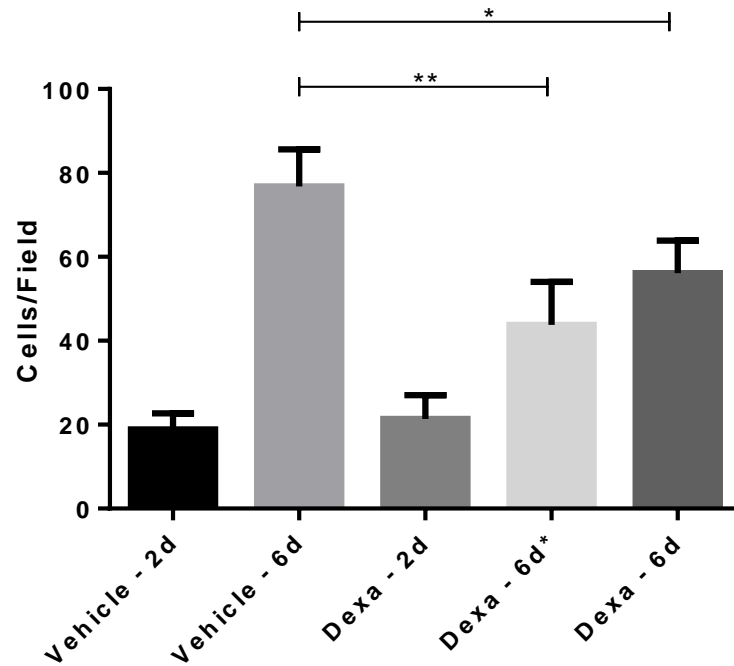

**Figure 2: TMCs cell count by Trypan blue.** Cells of each experimental condition were counted in 9 different fields upon Trypan blue staining. A representative image of two independent experiments is here shown (n=9). One-way ANOVA followed by Tukey's post-hoc significance test. \* $p < 0.0001$ , \*\* $p < 0.004$

A

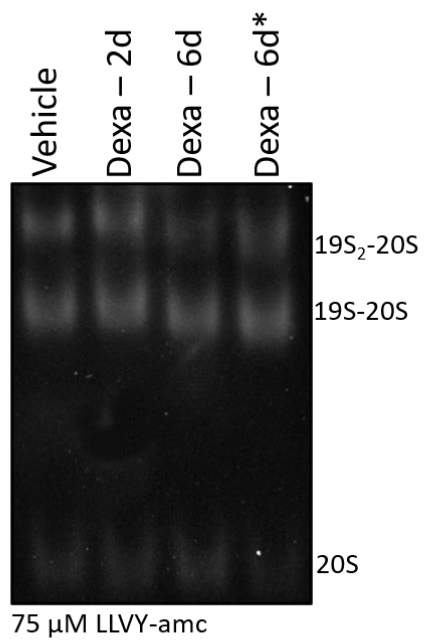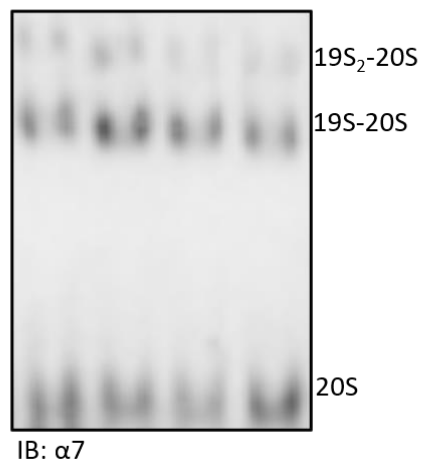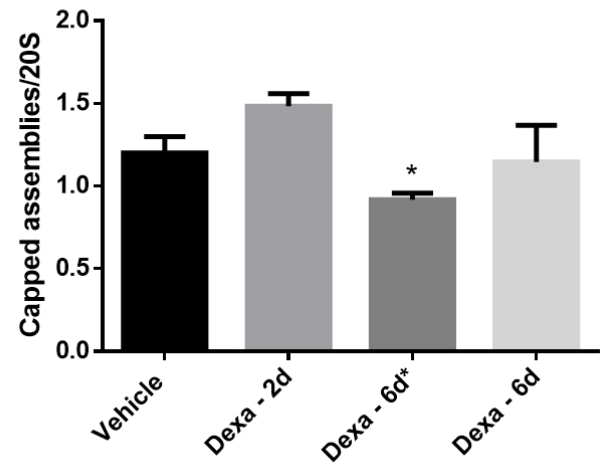

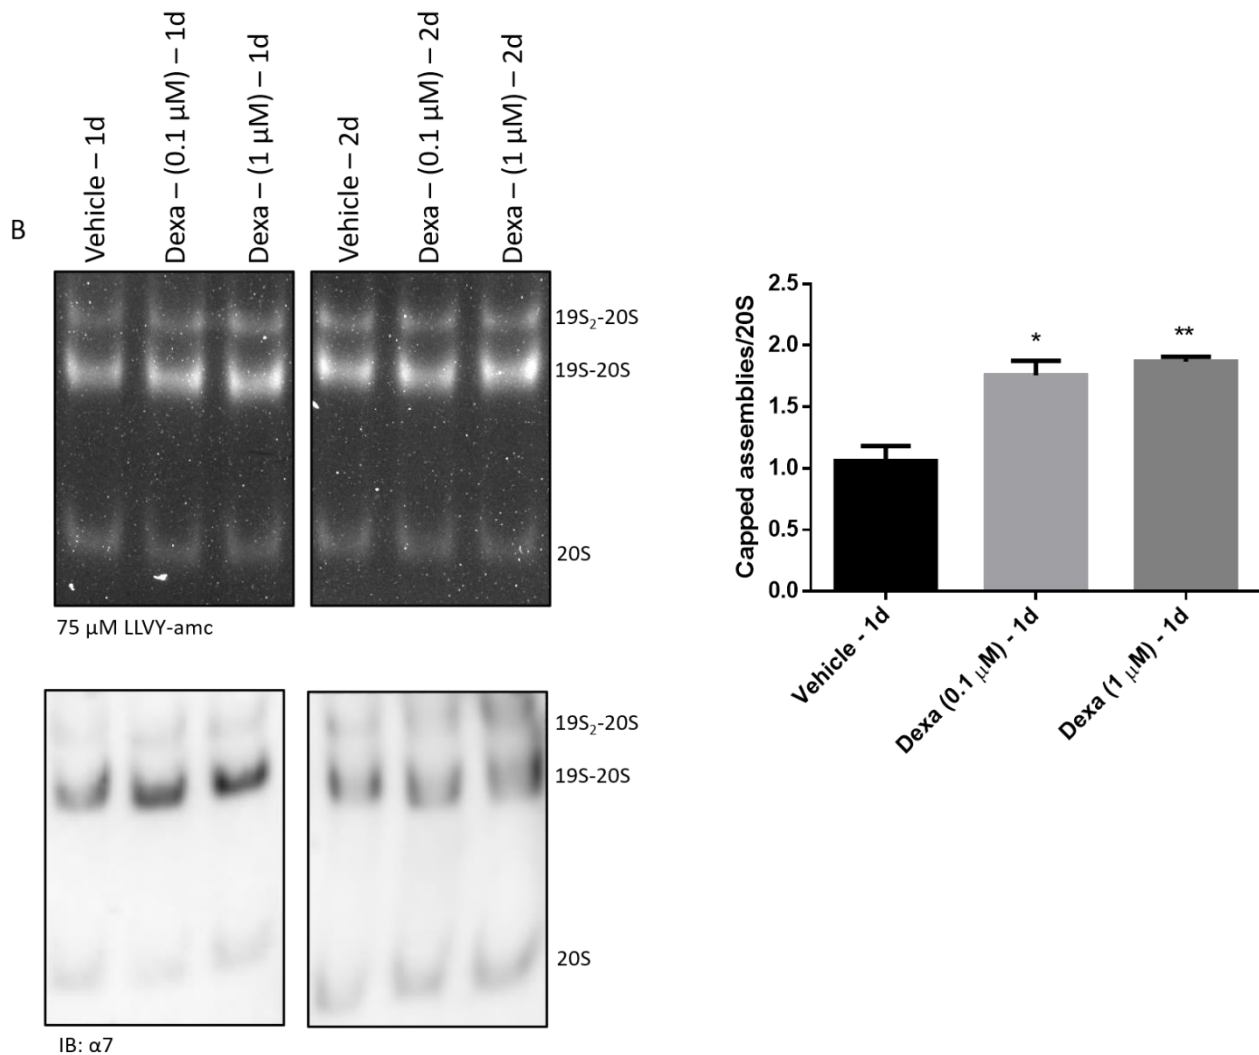

**Figure 3: Assessment of proteasome activity and assembly by native-gel electrophoresis.** (A) Proteasome particles were separated by mass/charge through native gel electrophoresis. The three main assemblies were probed with 75  $\mu$ M LLVY-amc (*upper panel*). The identity of the particles was verified by staining them with an anti- $\alpha$ 7 antibody (*lower panel*) \* $p < 0.003$ ; (B) proteasome assemblies of TMCs stimulated for 1 day and 2 days with 0.1  $\mu$ M and 1  $\mu$ M Dexa. \* $p < 0.0004$ , \*\* $p < 0.0001$ . In all cases quantification is reported as the sum of capped assemblies intensity vs that of 20S as they appear upon immunostaining. A representative experiment of three independent observations is reported ( $n=3$ ); One-way ANOVA followed by Tukey's post-hoc significance test.

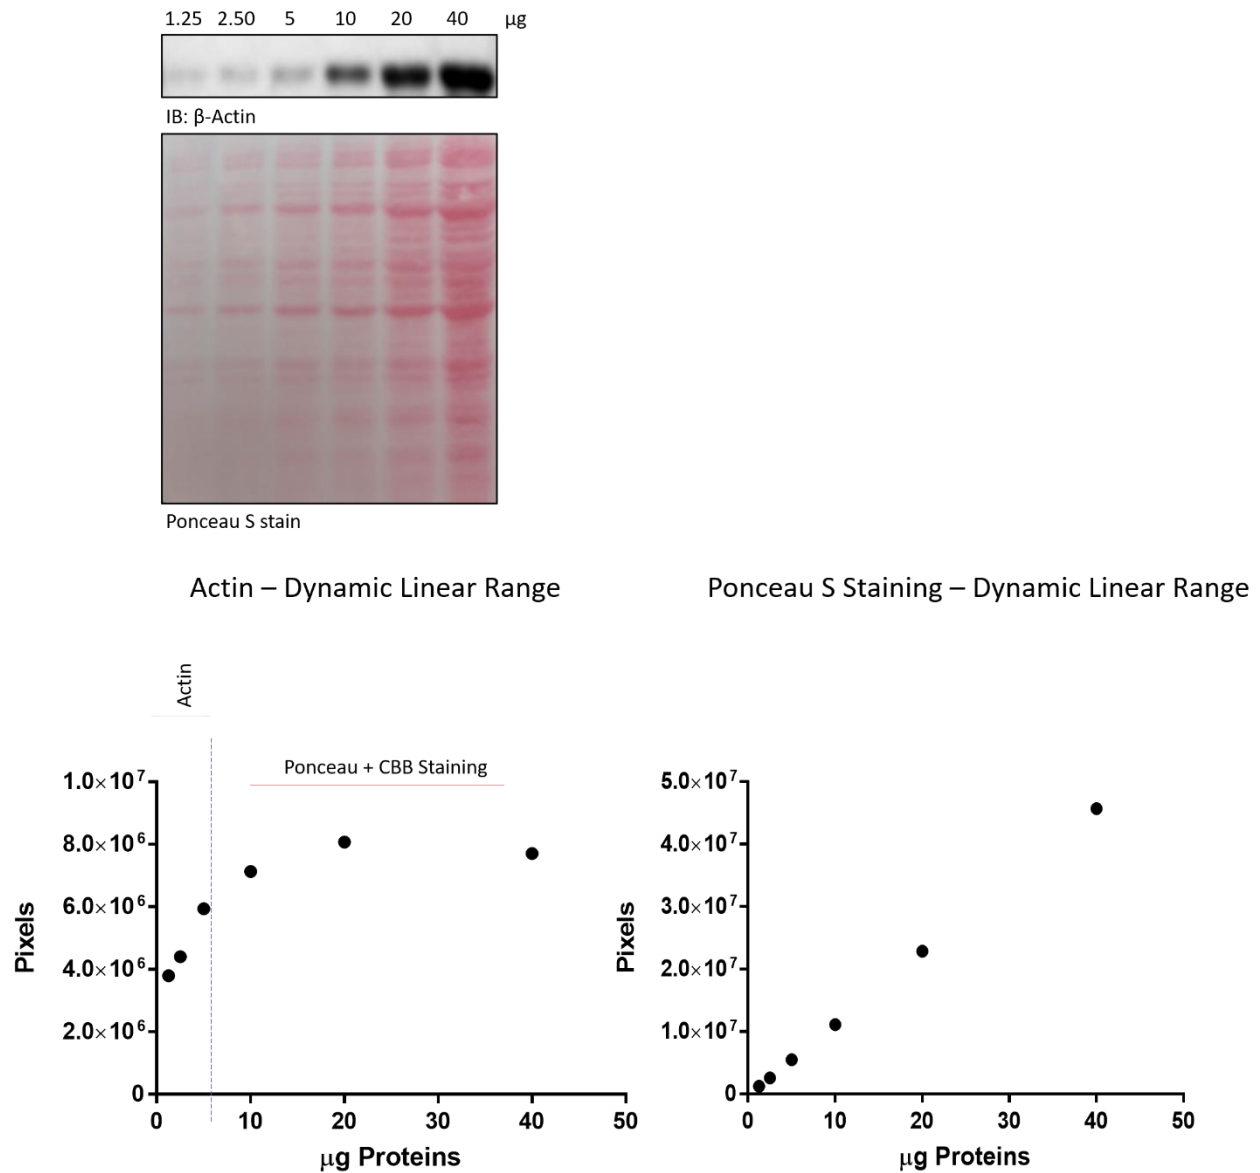

**Figure 4: Determination of  $\beta$ -actin and Ponceau S staining dynamic linear range.** Serial dilution (from 40  $\mu\text{g}$  to 1.25  $\mu\text{g}$ ) of a TMCs lysate were analysed by Western blotting and probed with the anti- $\beta$ -actin antibody. Bands intensity was determined by ImageJ and data plotted to visualize the range within which the signal was below the saturation threshold. Thereafter, proteins demanding  $\mu\text{g}$  loading higher than the saturation threshold normalized to Ponceau S staining (and confirmed by CBB, not shown).
